# Supplementary material for: Atomic doping to enhance the p-type behavior of BiFeO3 photoelectrodes for solar H2O2 production
Source: Royal Society of Chemistry journal article supplement (doi:10.1039/d4ta03191a), 2024-01-01
Supplement: d4ta03191a1.pdf [file d4ta03191a1.pdf]

## **Supplementary Information**

### **Atomic Doping to Enhance the p-type Behavior of BiFeO<sub>3</sub> Photoelectrodes for Solar H<sub>2</sub>O<sub>2</sub> Production**

Daye Seo,<sup>†a</sup> Andrew Grieder,<sup>†b</sup> Andjela Radmilovic,<sup>†a</sup> Sophya F. Alamudun,<sup>a</sup> Xin Yuan,<sup>a</sup> Yuan Ping,<sup>\*abc</sup> and Kyoung-Shin Choi<sup>\*a</sup>

*a Department of Chemistry, University of Wisconsin-Madison, Madison, WI 53706, United States*

*b Department of Materials Science and Engineering, University of Wisconsin-Madison, Madison, WI 53706, United States*

*c Department of Physics, University of Wisconsin-Madison, Madison, WI 53706, United States*

[†] These authors contributed equally to this work.

\* Correspondence and requests for materials should be addressed to Y.P. (yping3@wisc.edu) and K.-S.C. (kschoi@chem.wisc.edu).

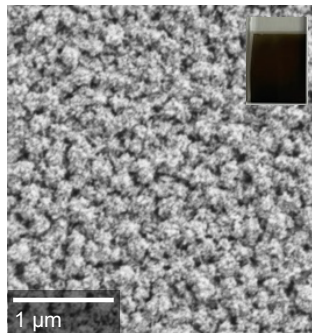

**Fig. S1** An SEM image of an as-deposited Bi/Fe film. The inset shows a photograph of the corresponding film.

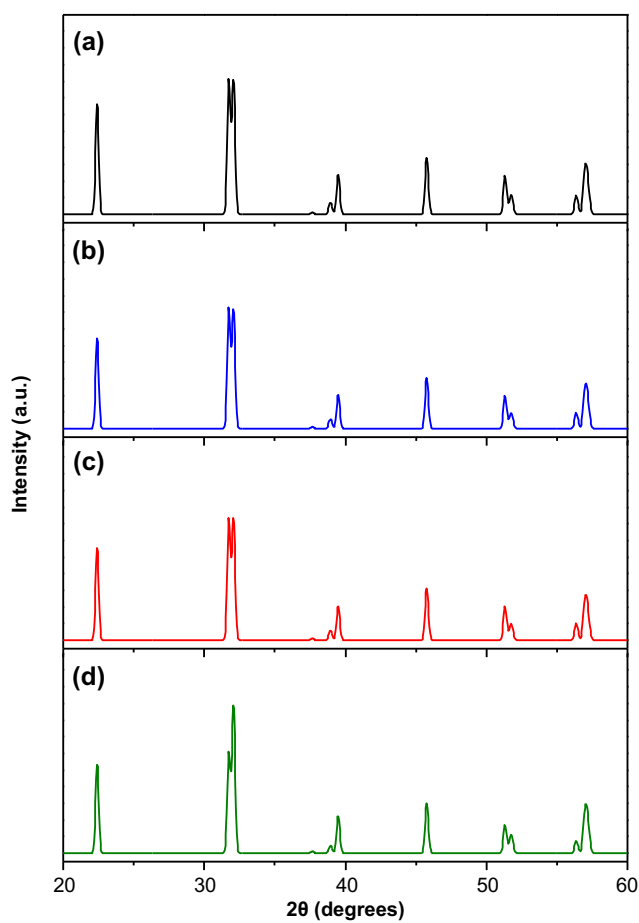

**Fig. S2** Simulated XRD patterns for (a) pristine  $\text{BiFeO}_3$  (ICSD #51664) with no preferential orientation, (b)  $\text{Bi}_{0.93}\text{FeO}_3$  with no preferential orientation, (c)  $\text{Na}_{0.07}\text{Bi}_{0.93}\text{FeO}_3$  with no preferential orientation and (d)  $\text{Na}_{0.07}\text{Bi}_{0.93}\text{FeO}_3$  with (110) preferential orientation.

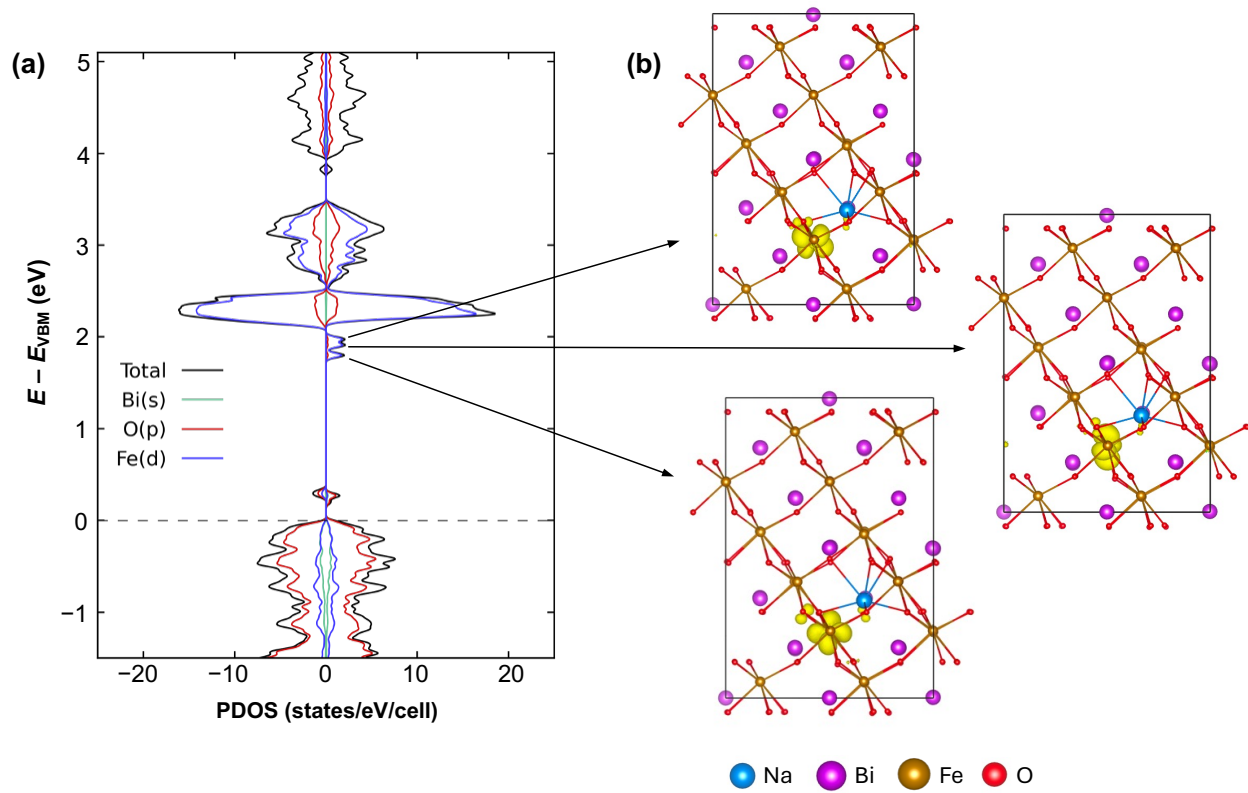

**Fig. S3** BiFeO<sub>3</sub> with a single Na substituted on Bi in a 120-atom supercell. (a) Projected density of states (PDOS) with spin up having positive values and spin down having negative values. (b) The norm-squared wavefunctions of the perturbed conduction band states right below the conduction band showing the character of  $t_{2g}$  of Fe atoms. The isosurface value is 1% of the maximum amplitude of the wavefunction.

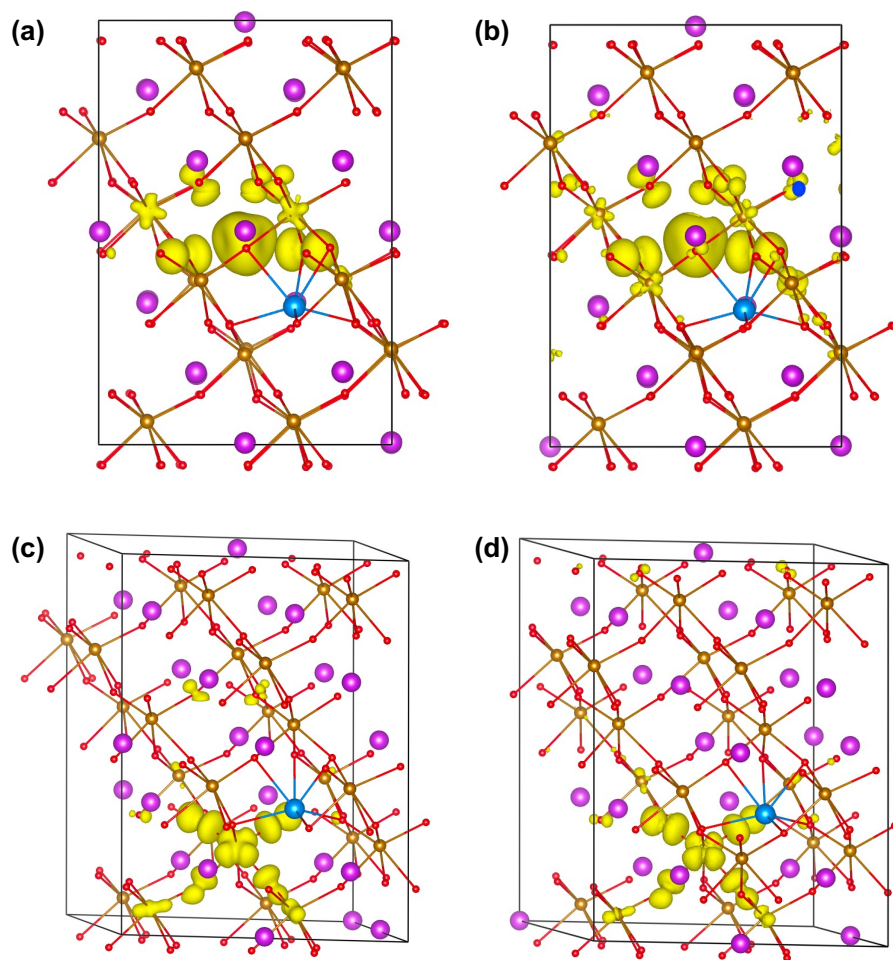

**Fig. S4** Norm-squared wave functions of the two hole-polarons computed using functionals HSE06 (a and c for spin up and spin down, respectively) and PBE+U (b and d for spin up and spin down, respectively). The isosurface value is 1% of the maximum amplitude of the wavefunction.

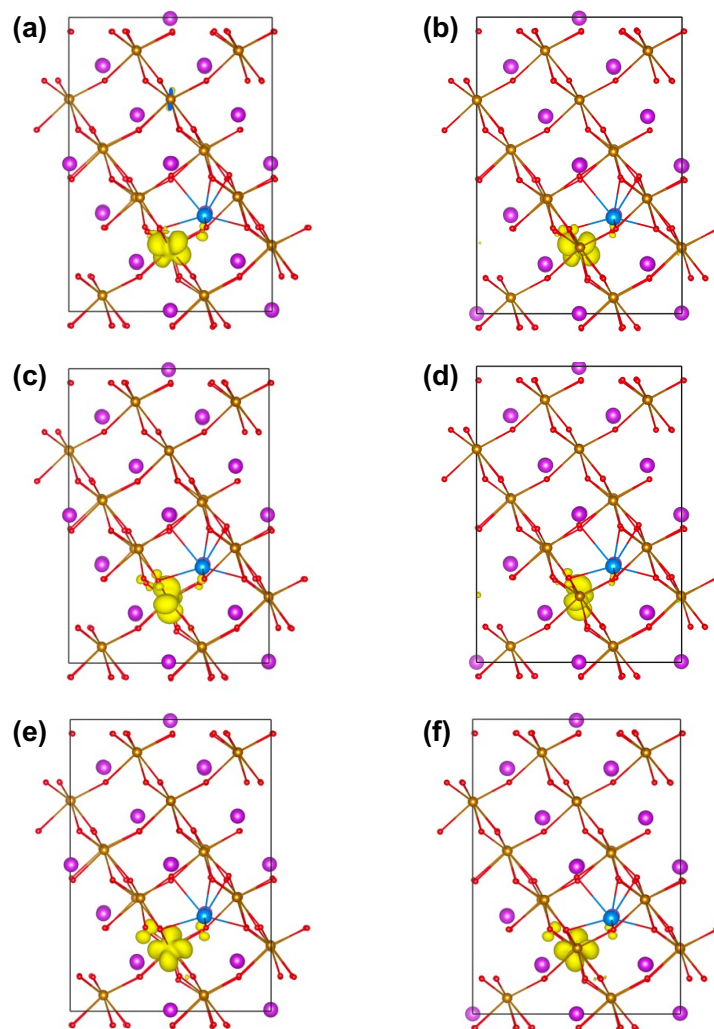

**Fig. S5** Norm-squared wave functions of the perturbed conduction band states below the CBM computed using functionals HSE06 (**a**, **c**, and **e**) and PBE+U (**b**, **d**, and **f**). The isosurface value is 1% of the maximum amplitude of the wavefunction.
